# Supplementary material for: Jejunum-derived NF-κB reporter organoids as 3D models for the study of TNF-alpha-induced inflammation
Source: PubMed Central journal article supplement (PMC9829906; doi:10.1038/s41598-022-18556-3), 2022-08-24
Supplement: 41598_2022_18556_MOESM1_ESM.pdf [file 41598_2022_18556_MOESM1_ESM.pdf]

## **Jejunum-derived NF- $\kappa$ B reporter organoids as 3D models for the study of TNF- $\alpha$ -induced inflammation.**

Hellen Daghero, Flora Doffe, Belén Varela, Victoria Yozzi, José Manuel Verdes, Martina Crispo, Mariela Bollati-Fogolín and Romina Pagotto

### **Supplementary Materials**

#### **Comparison of TNF- $\alpha$ -induced reporter response from different intestinal region-derived organoids.**

Organoids derived from duodenum, jejunum, ileum and colon were obtained from the transgenic reporter mice NF- $\kappa$ B hRE-Luc. They were stimulated with different concentrations of TNF- $\alpha$  and 24 h later, luciferase activity was measured as the mean of NF- $\kappa$ B activation. When possible, data presented in **Figure 4b** from the manuscript were fit to a 3 parameters dose-response curve using GraphPad Prism software. Results showed that jejunum-derived organoids best fit the model, with an R square of 0.916 and an EC50 of 3.66 ng/mL (Table S1).

Regarding the reporter response elicited by TNF- $\alpha$  10ng/mL, jejunum and ileum derived-organoids response was statistically different from colonoids (ANOVA and Tukey's multiple comparison-test; \*P< 0.05), which were unresponsive to the stimulus (Figure S1).

| Parameter | Duodenum  | Organoids derived from Jejunum | Ileum     | Colon |
|-----------|-----------|--------------------------------|-----------|-------|
| EC50      | 12.11     | 3.66                           | 0.12      | -     |
| CI 95%    | 1.64-8.16 | 0.98-14.9                      | very wide | -     |
| R2        | 0.54      | 0.92                           | 0.47      | -     |

**Table S1:** TNF- $\alpha$  concentration-response curve fitting parameters from different intestinal region-derived-organoids. The half-maximal effective concentration (EC50) to TNF- $\alpha$ , the corresponding 95% confidence interval (CI 95%) and the R square of the curve is indicated for each type of organoid. Data was obtained from triplicates from one representative experiment.

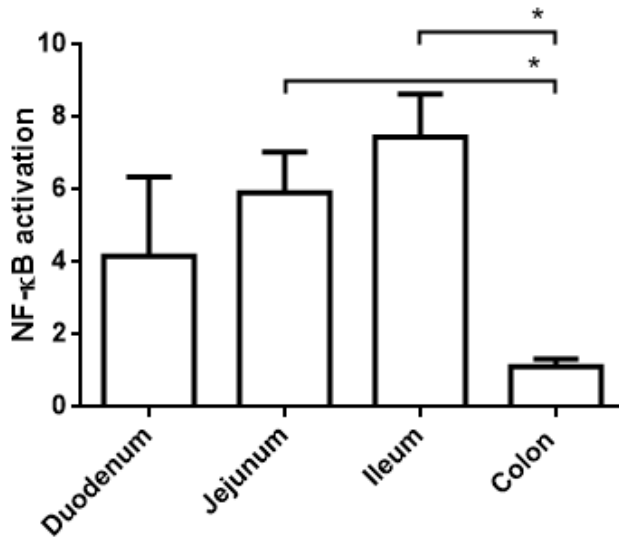

**Figure S1:** Comparison of the reporter response of different intestinal region-derived-organoids to TNF- $\alpha$  10 ng/mL. Data was expressed as mean  $\pm$  SD of triplicates from one representative experiment. \* $P < 0.05$ , significant differences in the NF- $\kappa$ B activation level attained between the indicated type of organoids.

**Comparison of TNF- $\alpha$ -induced reporter response from the same intestinal region-derived organoids.**

Duodenum-, jejunum-, ileum- and colon-derived organoids obtained from different NF- $\kappa$ B hRE-Luc mice ( $n=3$  for each region) were stimulated with TNF- $\alpha$  10 ng/mL and 24 h later, luciferase activity was measured. Results showed that jejunum and ileum responses to TNF- $\alpha$  were significantly higher compared to the unstimulated organoids (ANOVA and Tukey's multiple comparison-test; # $P < 0.05$ ). Nevertheless, the maximum level of NF- $\kappa$ B activation attained was different between animals (ANOVA and Tukey's multiple comparison-test; \* $P < 0.05$ ). Two organoids did not differ from the control value regarding duodenum, whereas colon-derived organoids were unresponsive in all cases (Figure S2).

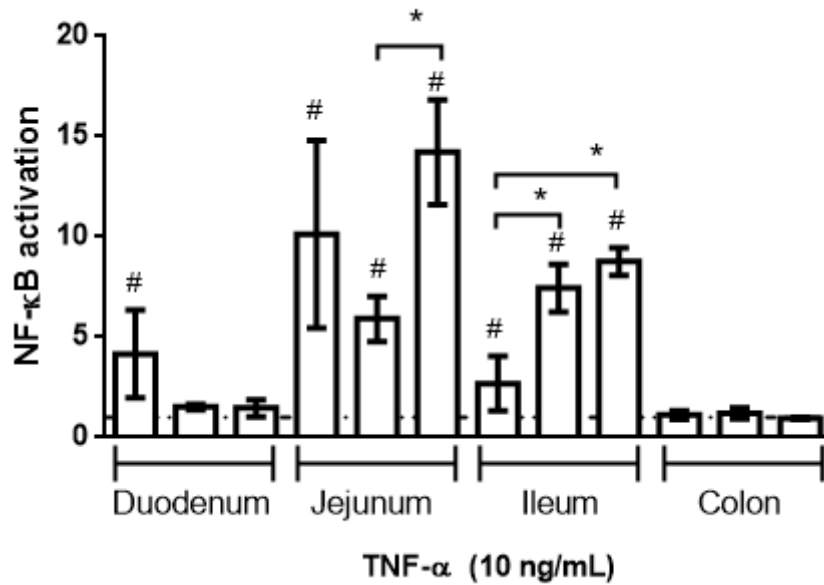

**Figure S2:** Comparison of the reporter response of organoids from different animals to TNF- $\alpha$  10 ng/mL. Organoids derived from different NF- $\kappa$ B hRE-Luc mice were stimulated with TNF- $\alpha$  10 ng/mL and the reporter response was measured. NF- $\kappa$ B activation was expressed as fold change with respect to the unstimulated control. Data was expressed as mean  $\pm$  SD of triplicates. \*P < 0.05, significant differences between indicated bars; #P < 0.05, significant differences with respect to the unstimulated control from the same intestinal region-derived organoid.

| <b>Gene (mouse)</b>             | <b>Forward Primer</b>     | <b>Reverse Primer</b>     | <b>NM number</b> |
|---------------------------------|---------------------------|---------------------------|------------------|
| <b>Chromogranin A</b>           | 5'AGACTACAGACCCACTCCCG 3' | 5'AGATGACTTCCAGGACGCAC 3' | NM 007693.2      |
| <b>Lgr5</b>                     | 5'TCTCCTACATCGCCTCTGCT 3' | 5'TTCCTCCGGAACCTGTCTCA 3' | NM 010195        |
| <b>Lysozyme</b>                 | 5'AACTACAACCGTGGAGACCG 3' | 5'TGCAATTGATCCCACAGGCA 3' | NM 0.13590.4     |
| <b>Mucin 2</b>                  | 5'AACTGCTCTCTGGACTGCC 3'  | 5'TTGGTTGGTGTGCTGAGTGT 3' | NM 023566.3      |
| <b>Villin</b>                   | 5'ATTCCTTCAGACGCATGCCA 3' | 5'GCCCTCCCTTTTGAGTGTGA 3' | NM 009509.2      |
| <b><math>\beta</math>-actin</b> | 5'GCAGGAGTACGATGAGTCCG 3' | 5'ACGCAGCTCAGTAACAGTCC 3' | NM 007393.5      |
| <b>TNF-R1/ Tnfrsf1a</b>         | 5'GATCCCCTGCCTGTCAAAGA 3' | 5'TCGCAAGGTCTGCATTGTCA 3' | NM 011609.4      |
| <b>TNF-R2/ Tnfrsf1b</b>         | 5'GATGCCAAGGTGCCTCATGT 3' | 5'TGGCTTCCGTGGGAAGAATC 3' | NM 011610.3      |

**Table S2:** Primers used for real-time RT-PCR experiments
